# Supplementary material
Source: PubMed Central journal article supplement (PMC9683367)
Supplement: Search_strategy.pdf [file Search_strategy.pdf]

## Appendix 1. General electronic search strategy.

Search term combinations included continuity of patient care, continuum of care, family physicians, primary care physicians, community medicine, general practice, and family practice. Searches for title and abstract included continuity of “adj2” care, family physician, family practice, family doctor, family practitioner, family clinician, general practi\*, community medicine, primary care physician, primary care doctor, primary care clinician, interview, experience, qualitative. Finally, the language was set to English and the date was set from 1978-Present.

## Appendix 2. Full electronic search strategy for MEDLINE (Ovid).

Database(s): **Ovid MEDLINE: Epub Ahead of Print, In-Process & Other Non-Indexed Citations, Ovid MEDLINE® Daily and Ovid MEDLINE® 1946-Present** (November 11, 2019). Search term combinations included the following:

| #  | Searches                                                                             | Results |
|----|--------------------------------------------------------------------------------------|---------|
| 1  | "continuity of patient care"/ or transition to adult care/                           | 19685   |
| 2  | (continuity of adj2 care).tw.                                                        | 6716    |
| 3  | physicians, family/or physicians, primary care/                                      | 19281   |
| 4  | community medicine/ or general practice/ or family practice/                         | 75548   |
| 5  | (family adj3 (physician* or practice or doctor* or practitioner* or clinician*)).tw. | 31640   |
| 6  | general practi*.tw.                                                                  | 78238   |
| 7  | community medicine.tw.                                                               | 1495    |
| 8  | (primary care adj3 (physician* or doctor* or clinician*)).tw.                        | 23102   |
| 9  | (interview: or experience:).mp. or qualitative.tw.                                   | 1432904 |
| 10 | 1 or 2                                                                               | 23740   |
| 11 | or/3-8                                                                               | 168523  |
| 12 | 10 and 11                                                                            | 2604    |
| 13 | 9 and 12                                                                             | 812     |
| 14 | limit 13 to (english language and yr="1978-Current")                                 | 775     |
